# Supplementary material for: Cinnamon-Derived Hierarchically Porous Carbon as an Effective Lithium Polysulfide Reservoir in Lithium–Sulfur Batteries
Source: PubMed Central journal article supplement (PMC7353079; doi:10.3390/nano10061220), 2020-06-22
Supplement: nanomaterials-10-01220-s001.pdf [file nanomaterials-10-01220-s001.pdf]

# Supporting Information

## Biomass-derived Hierarchically Porous Carbon as an Effective Lithium Polysulfide Reservoir in Lithium-Sulfur Batteries

Ranjith Thangavel <sup>1,2,†</sup> Aravindaraj G Kannan <sup>3,†</sup> Rubha Ponraj <sup>3</sup>, Karthikeyan Kaliyappan<sup>4</sup>, Won-Sub Yoon <sup>2</sup>, Dong-Won Kim <sup>3,\*</sup> and Yun-Sung Lee <sup>1,\*</sup>

<sup>1</sup> School of Chemical Engineering, Chonnam National University, Gwang-ju, 61186, Republic of Korea

<sup>2</sup> Department of Energy Science, Sungkyunkwan University, Suwon, 16419, Republic of Korea

<sup>3</sup> Department of Chemical Engineering, Hanyang University, Seoul, 04763, Republic of Korea

<sup>4</sup> Department of Chemical Engineering, University of Waterloo, Waterloo, Ontario, N2L 3G1, Canada

\* Correspondence: [dongwonkim@hanyang.ac.kr](mailto:dongwonkim@hanyang.ac.kr) (D.-W. Kim); [leey@chonnam.ac.kr](mailto:leey@chonnam.ac.kr) (Y.-S. Lee)

† Equal contribution

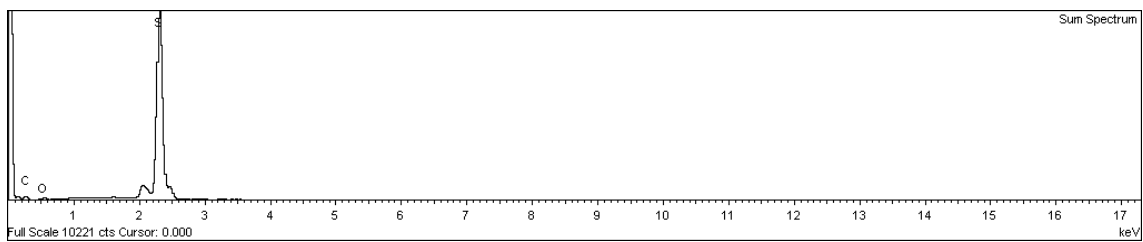

**Figure S1.** SEM EDS spectrum of CSC/S sample. The amounts of carbon, oxygen and sulfur were determined to 29.5, 1.8 and 68.7 wt.%, respectively.

**Figure S2.** Pore size distribution plots of (a) CSC and (b) CSC/S.

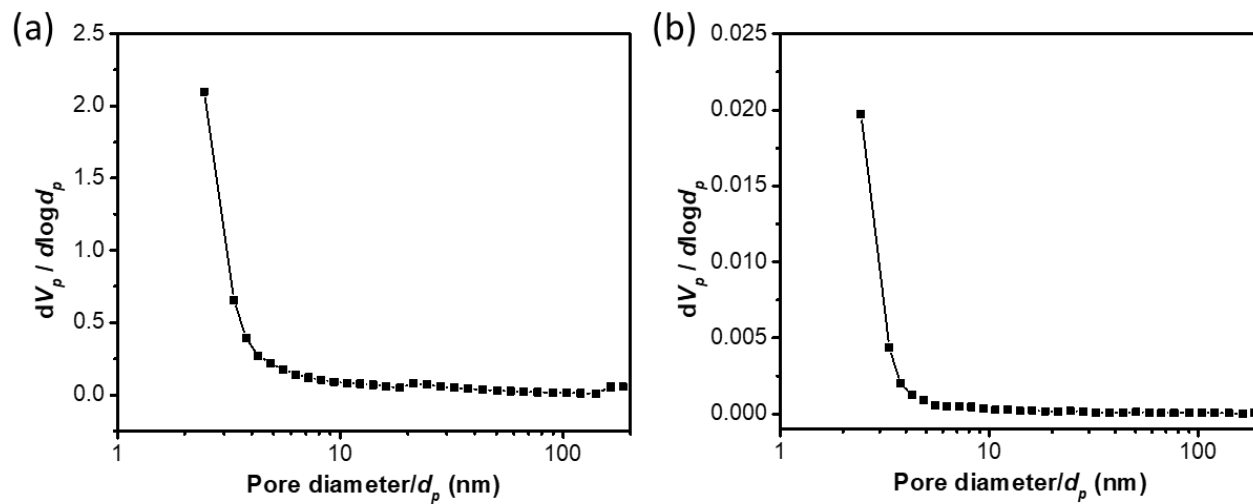

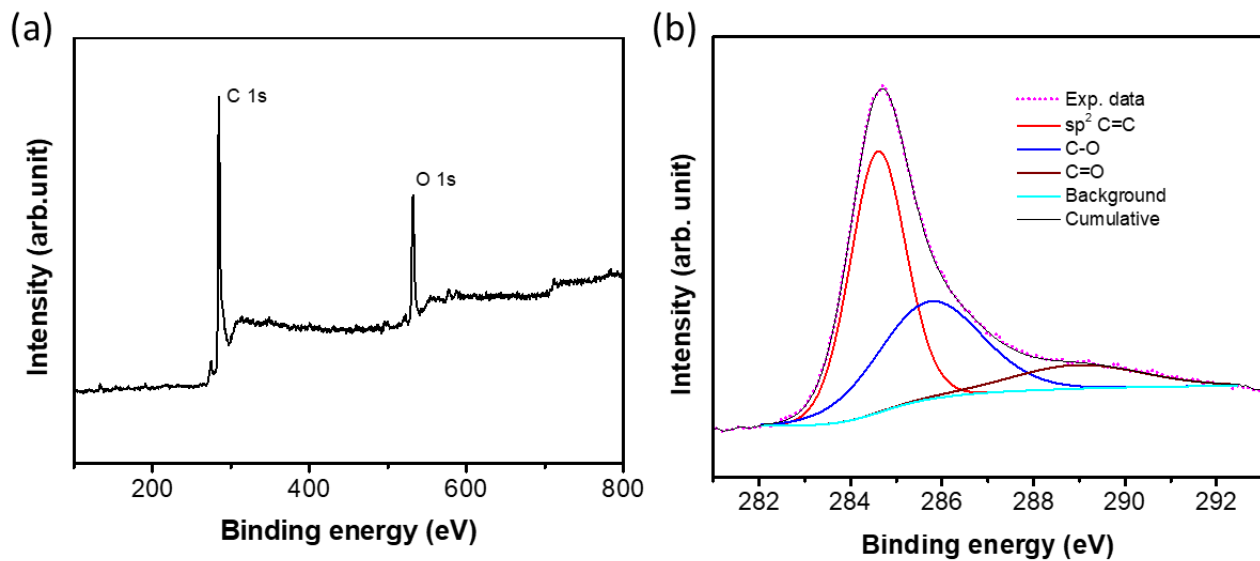

**Figure S3.** (a) XPS Survey of CSC, and (b) De-convoluted high-resolution C 1s XPS spectra of CSC

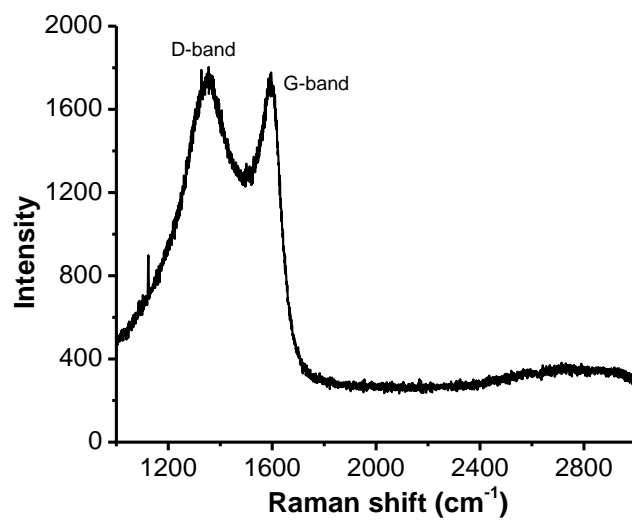

**Figure S4.** Raman spectrum of CSC sample showing the presence of G- and D-bands.

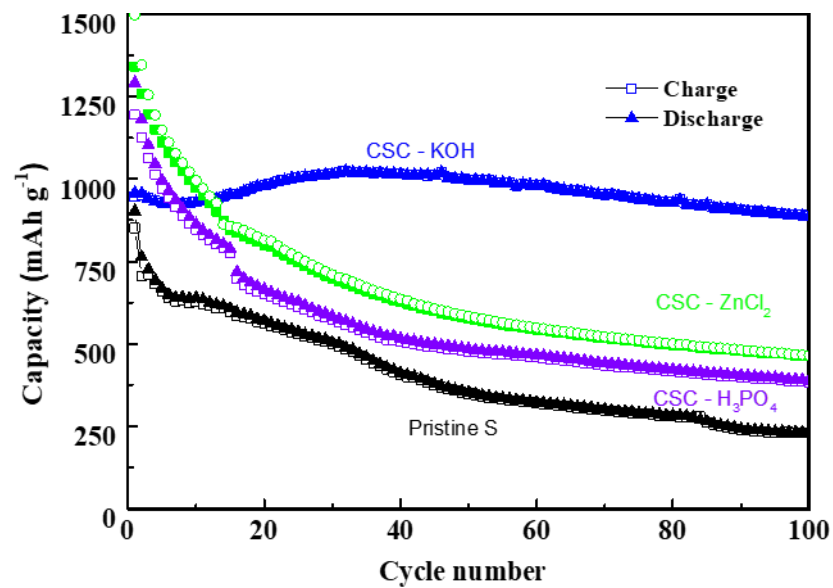

**Figure S5.** Comparison of cyclic stability (0.2C) of CSC/S activated with different chemical agents.

|           | <b>Solution resistance (<math>R_s</math>)</b> | <b>Charge transfer resistance (<math>R_{ct}</math>)</b> |
|-----------|-----------------------------------------------|---------------------------------------------------------|
|           | <b><math>\Omega</math></b>                    | <b><math>\Omega</math></b>                              |
| Before CV | 3.3                                           | 130.96                                                  |
| After CV  | 4.5                                           | 34.27                                                   |

Table S1. Electrolyte solution resistance, and charge transfer resistance of CSC/C before and after CV

|                      | Activation agent               | Surface area (m <sup>2</sup> g <sup>-1</sup> ) | Pore volume (cm <sup>3</sup> g <sup>-1</sup> ) | Discharge capacity (mAh g <sup>-1</sup> ) | Stability                  | Sulfur content (wt.%) |
|----------------------|--------------------------------|------------------------------------------------|------------------------------------------------|-------------------------------------------|----------------------------|-----------------------|
| Cinnamon (This work) | KOH                            | 3180                                           | 1.64                                           | 1248                                      | 85% - 150 cycles (0.2 C)   | 70                    |
| Apricot shell[1]     | KOH                            | 2269                                           | 1.05                                           | 1277                                      | 55.6% - 200 cycles (0.2 C) | 53.5                  |
| Pomelo peel[2]       | KOH                            | 1533                                           | 0.84                                           | 1258                                      | 59.6% - 100 cycles (0.2 C) | 60                    |
| Walnut shell[3]      | KOH                            | 2318                                           | 1.137                                          | 1350                                      | 67.4% - 100 cycles (0.1 C) | 48.8                  |
| Bamboo[4]            | KOH                            | 776                                            | 0.33                                           | 907                                       | 66.7% - 300 cycles (1 C)   | 70                    |
| Goat Hair[5]         | H <sub>3</sub> PO <sub>4</sub> | 535.4                                          | 0.39                                           | 1185                                      | 41.2% - 300 cycles (0.2 C) | 54.33                 |
| Cotton[6]            | KOH, Urea                      | 1286                                           | 1.15                                           | 1017                                      | 74.7% - 200 cycles (0.2 C) | 68                    |
| Silk cocoons[7]      | KOH                            | 3243                                           | 2.1                                            | 1443                                      | 55.12% - 80 cycles (0.5 C) | 48                    |

Table S2. Table comparing the textural properties of CDC, and electrochemical performance of CSC/S with other bio-mass carbon.[1-7]

1. Yang, K.; Gao, Q.; Tan, Y.; Tian, W.; Zhu, L.; Yang, C. Microporous carbon derived from Apricot shell as cathode material for lithium–sulfur battery. *Microporous and Mesoporous Materials* **2015**, *204*, 235-241.
2. Zhang, J.; Xiang, J.; Dong, Z.; Liu, Y.; Wu, Y.; Xu, C.; Du, G. Biomass derived activated carbon with 3D connected architecture for rechargeable lithium–sulfur batteries. *Electrochim. Acta* **2014**, *116*, 146-151.
3. Liu, J.; Liu, B.; Wang, C.; Huang, Z.; Hu, L.; Ke, X.; Liu, L.; Shi, Z.; Guo, Z. Walnut shell – Derived activated carbon: Synthesis and its application in the sulfur cathode for lithium–sulfur batteries. *J. Alloys Compd.* **2017**, *718*, 373-378.
4. Gu, X.; Lai, C.; Liu, F.; Yang, W.; Hou, Y.; Zhang, S. A conductive interwoven bamboo carbon fiber membrane for Li–S batteries. *J. Mater. Chem. A* **2015**, *3*, 9502-9509.
5. Ren, J.; Zhou, Y.; Wu, H.; Xie, F.; Xu, C.; Lin, D. Sulfur-encapsulated in heteroatom-doped hierarchical porous carbon derived from goat hair for high performance lithium–sulfur batteries. *Journal of Energy Chemistry* **2019**, *30*, 121-131.
6. Wang, H.; Chen, Z.; Liu, H.K.; Guo, Z. A facile synthesis approach to micro–macroporous carbon from cotton and its application in the lithium–sulfur battery. *RSC Advances* **2014**, *4*, 65074-65080.
7. Zhang, B.; Xiao, M.; Wang, S.; Han, D.; Song, S.; Chen, G.; Meng, Y. Novel Hierarchically Porous Carbon Materials Obtained from Natural Biopolymer as Host Matrixes for Lithium–Sulfur Battery Applications. *ACS Appl. Mater. Interfaces* **2014**, *6*, 13174-13182.
